# Supplementary material for: AB-type monomer of polyhedral oligomeric silsesquioxane
Source: Royal Society of Chemistry journal article supplement (doi:10.1039/d3qi02674d), 2024-01-01
Supplement: d3qi02674d1.pdf [file d3qi02674d1.pdf]

## **AB-type monomer of polyhedral oligomeric silsesquioxane**

Taishi Nakano,<sup>a</sup> Hiroaki Imoto<sup>\*a,b</sup> and Kensuke Naka<sup>\*a,c</sup>

### **Contents:**

1. NMR spectra
2. MALDI-TOF-MS spectra
3. SEC traces
4. Substrate scope
5. DFT calculations

## 1. NMR spectra

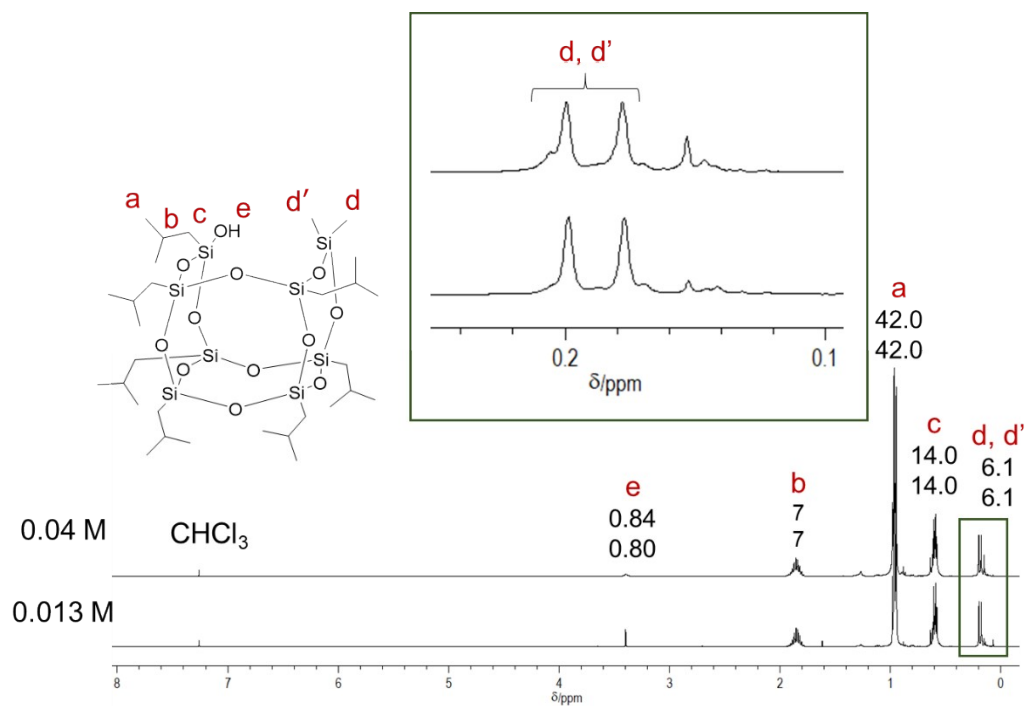

**Figure S1.**  $^1\text{H}$ -NMR spectra (400 MHz) of **2** in  $\text{CDCl}_3$ .

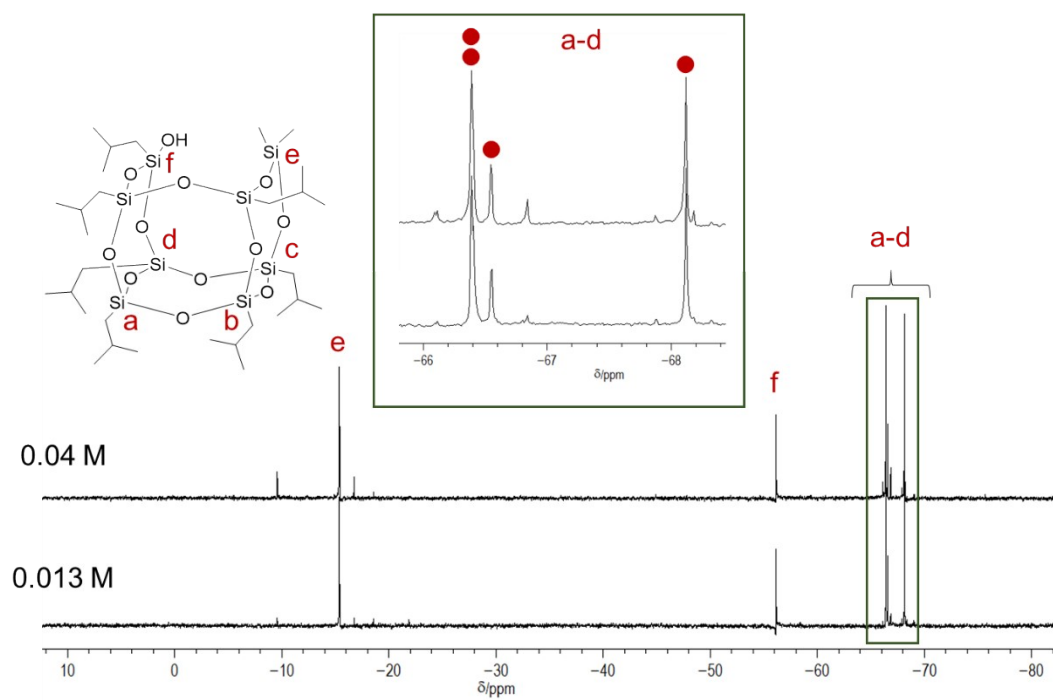

**Figure S2.**  $^{29}\text{Si}$ -NMR spectra (80 MHz) of **2** in  $\text{CDCl}_3$ .

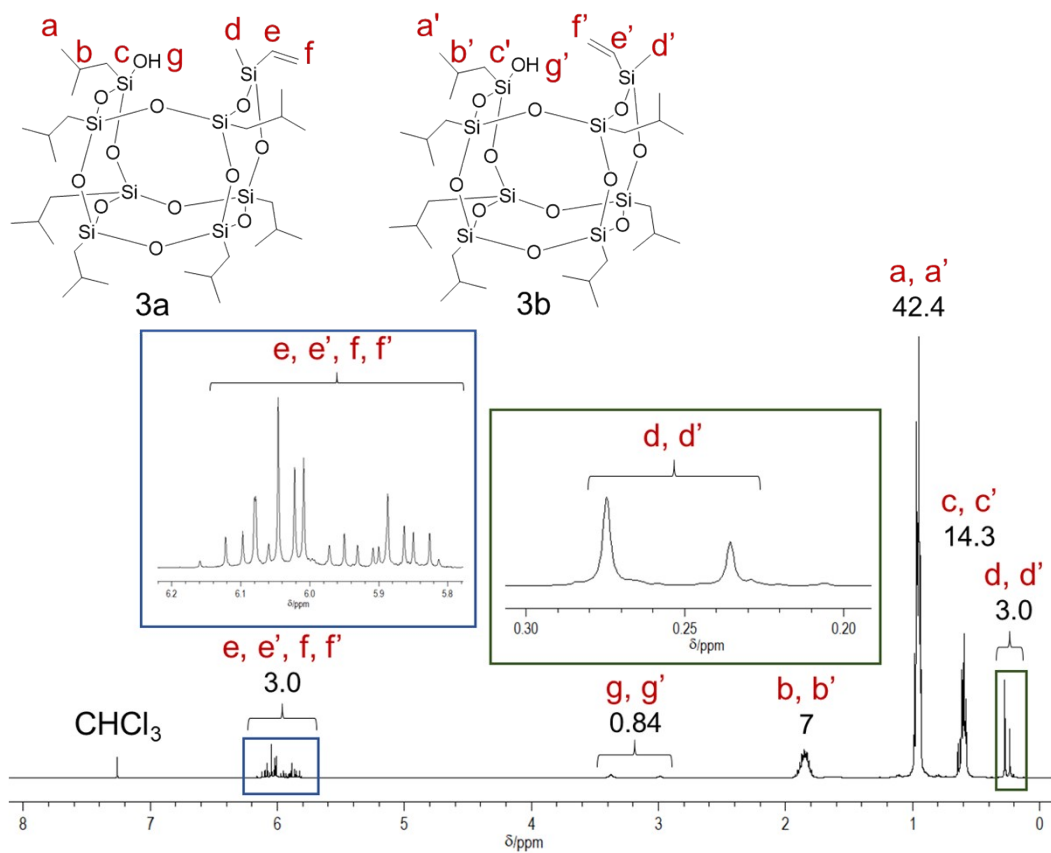

Figure S3.  $^1\text{H-NMR}$  spectra (400 MHz) of **3** in  $\text{CDCl}_3$ .

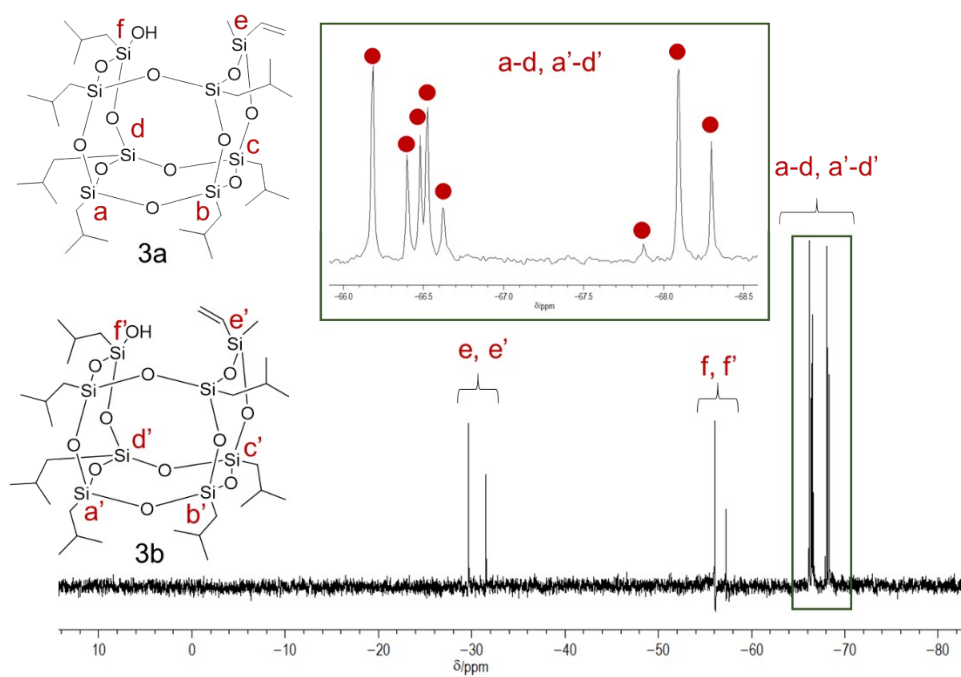

Figure S4.  $^{29}\text{Si-NMR}$  spectra (80 MHz) of **3** in  $\text{CDCl}_3$ .

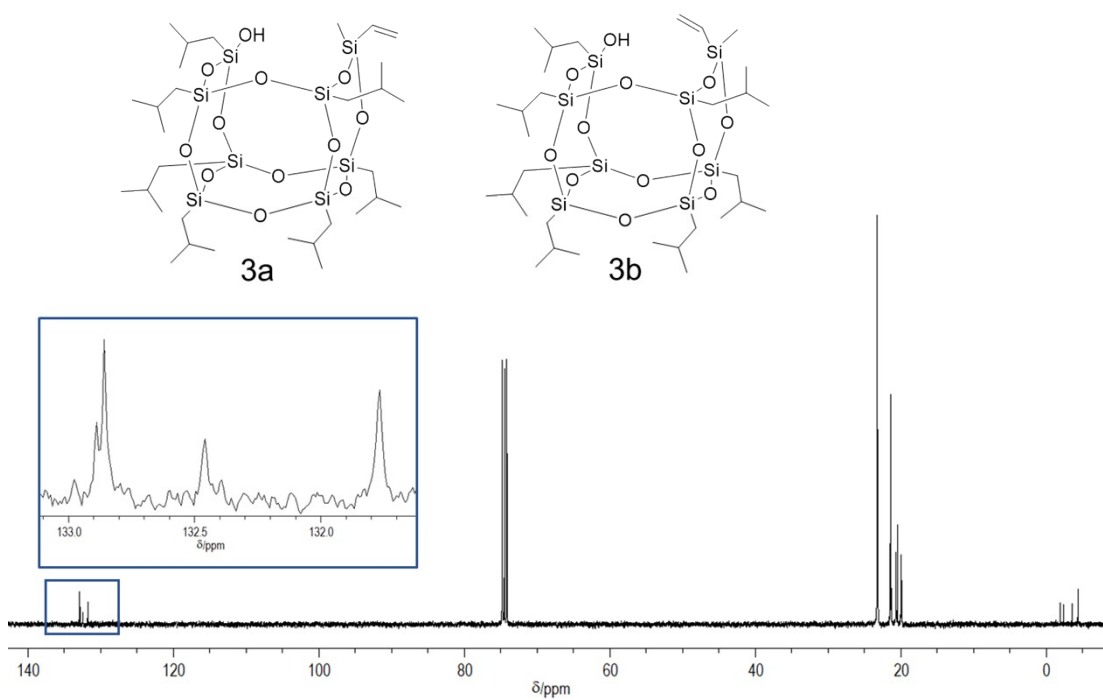

**Figure S5.**  $^{13}\text{C}$ -NMR spectra (100 MHz) of **3** in  $\text{CDCl}_3$ .

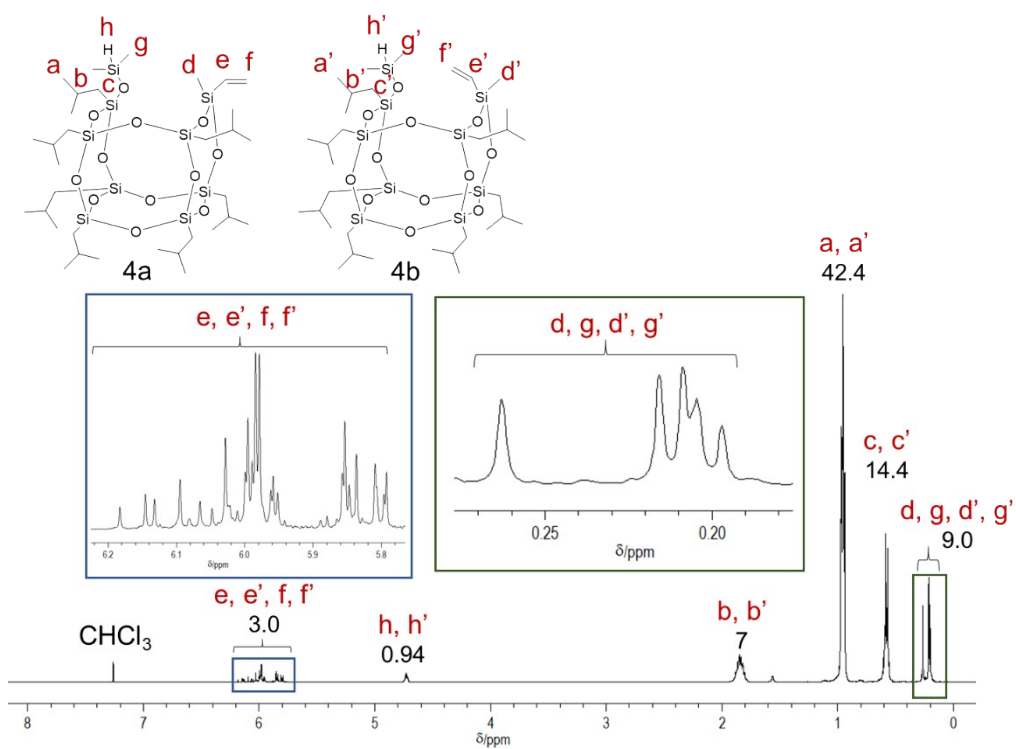

**Figure S6.**  $^1\text{H}$ -NMR spectra (400 MHz) of **4** in  $\text{CDCl}_3$ .

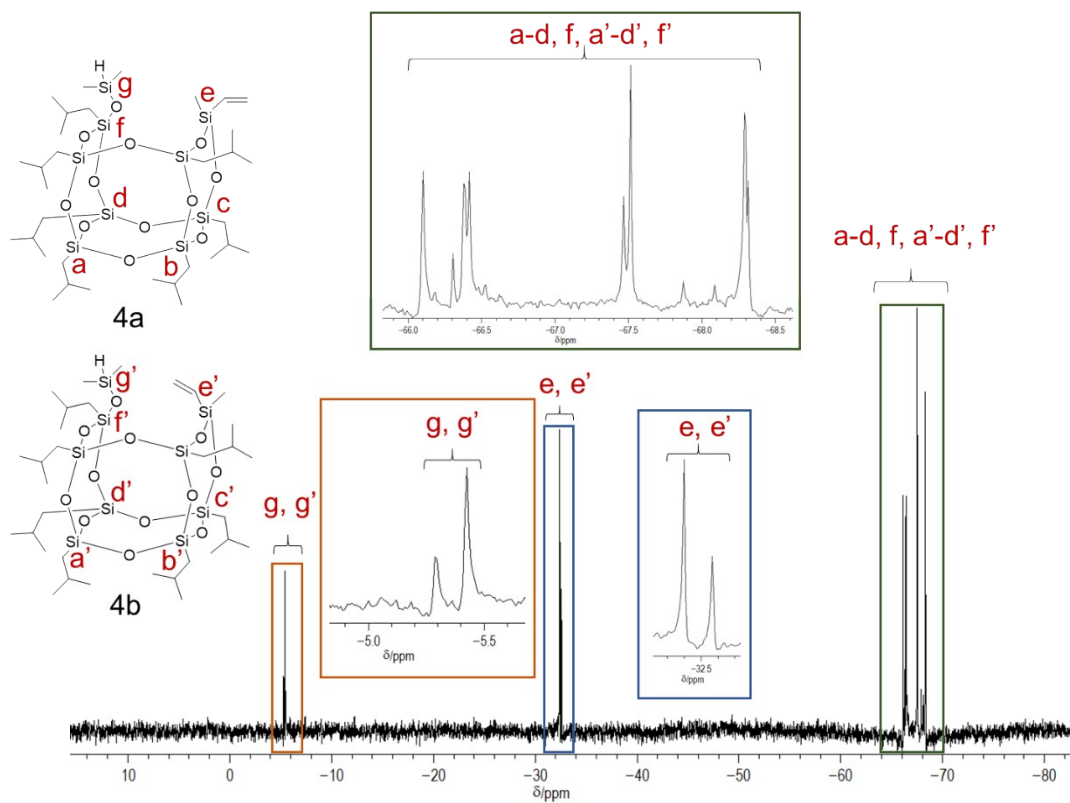

**Figure S7.**  $^{29}\text{Si}$ -NMR spectra (80 MHz) of **4** in  $\text{CDCl}_3$ .

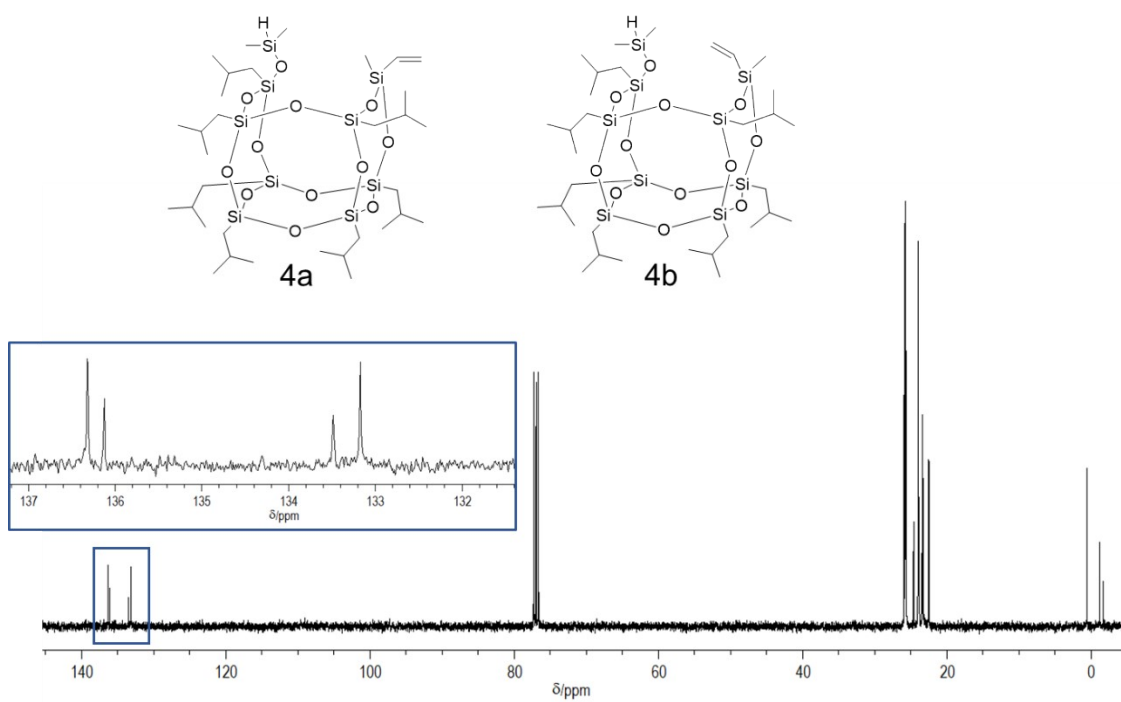

**Figure S8.**  $^{13}\text{C}$ -NMR spectra (100 MHz) of **4** in  $\text{CDCl}_3$ .

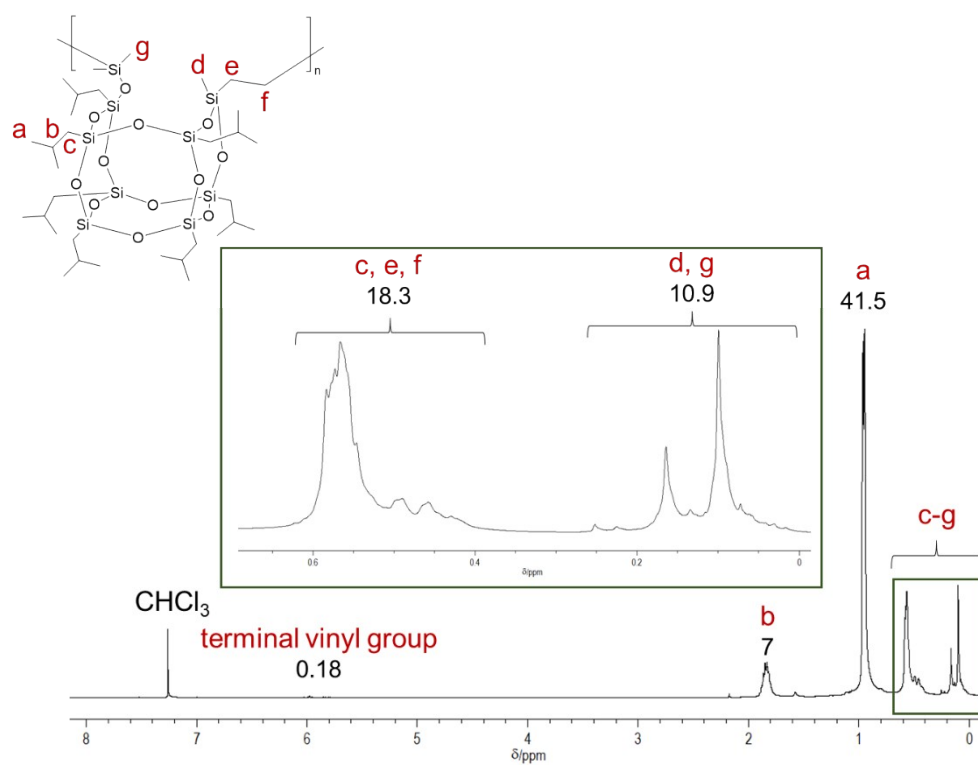

**Figure S9.**  $^1\text{H}$ -NMR spectra (400 MHz) of **5** in  $\text{CDCl}_3$ .

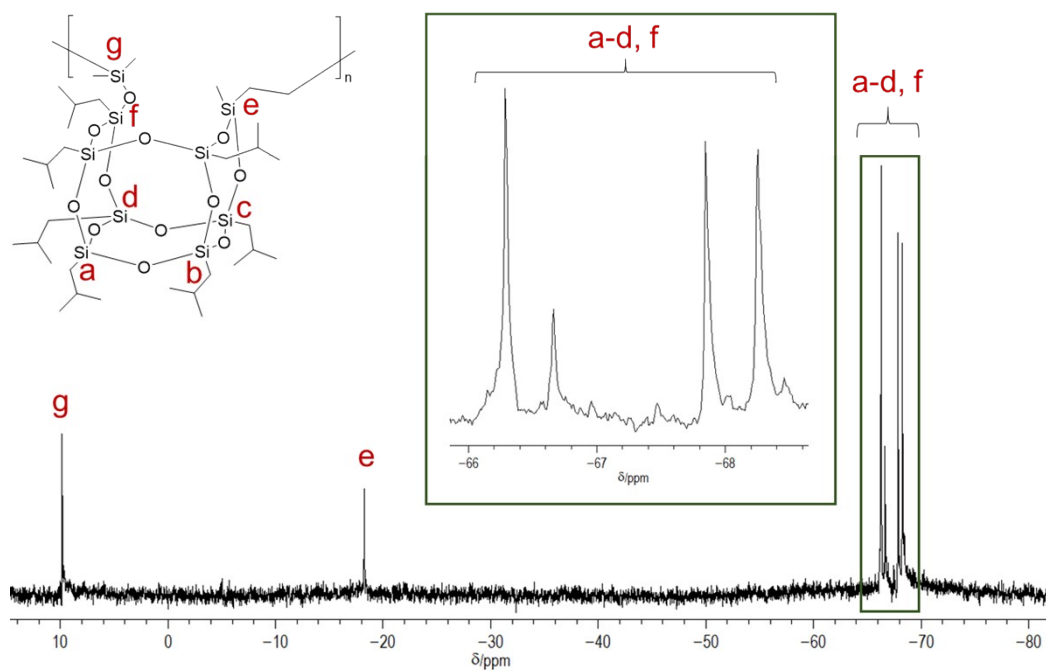

**Figure S10.**  $^{29}\text{Si}$ -NMR spectra (80 MHz) of **5** in  $\text{CDCl}_3$ .

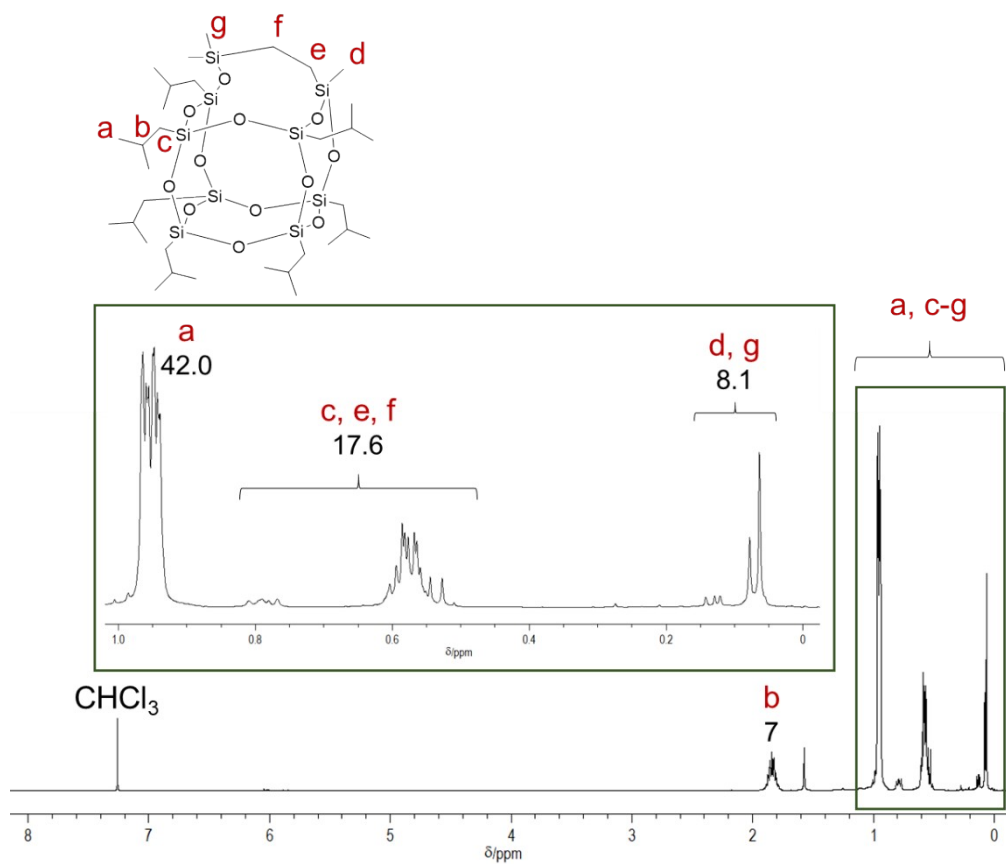

**Figure S11.**  $^1\text{H}$ -NMR spectra (400 MHz) of **6** in  $\text{CDCl}_3$ .

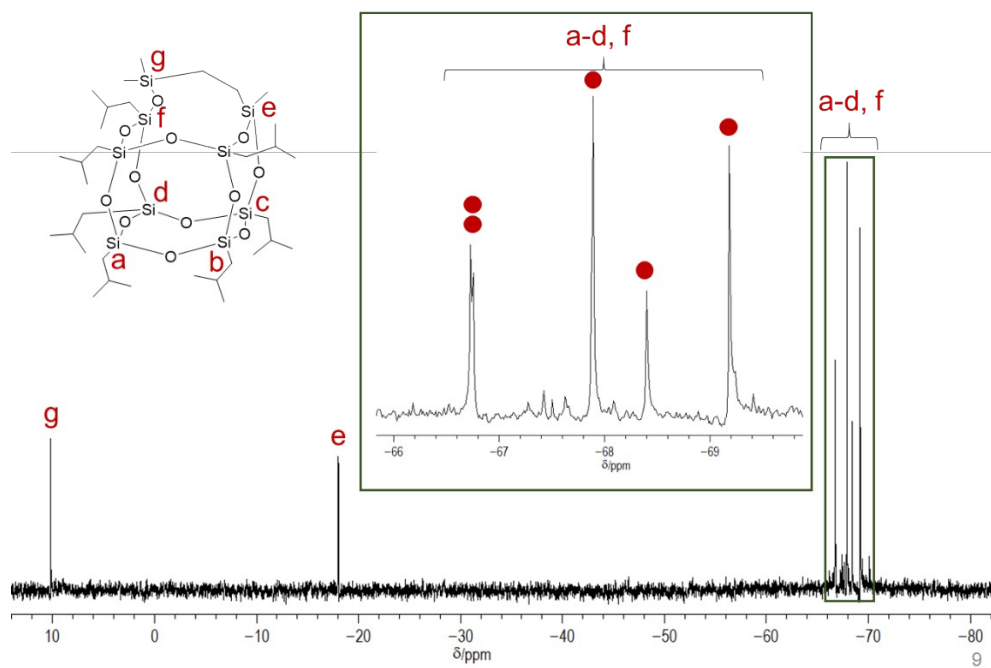

**Figure S12.**  $^{29}\text{Si}$ -NMR spectra (80 MHz) of **6** in  $\text{CDCl}_3$ .



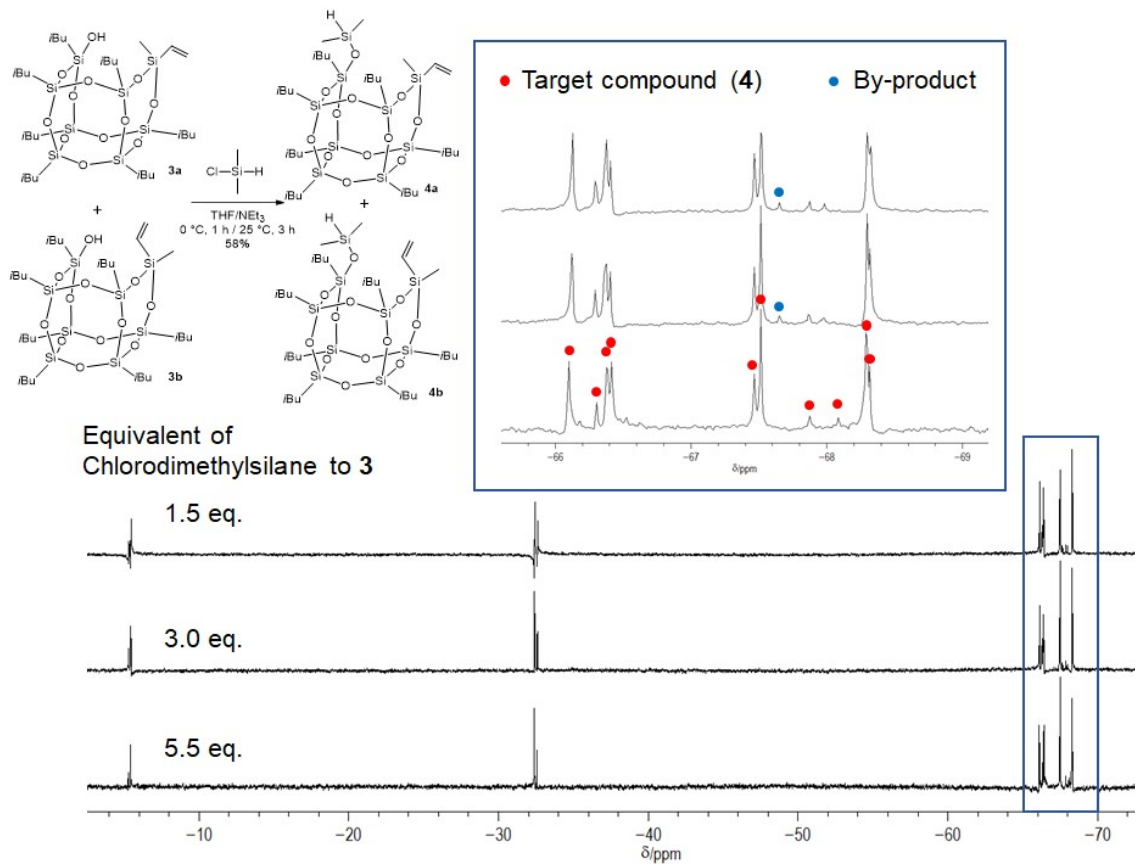

**Figure S13.**  $^{29}\text{Si-NMR}$  spectra (80 MHz in  $\text{CDCl}_3$ ) of crude products after the reaction of **3a/3b** with chlorodimethylsilane (1.5, 3.0, and 5.5 eq.). Red and blue dots indicate target compound **4a/4b** and by-products, respectively.

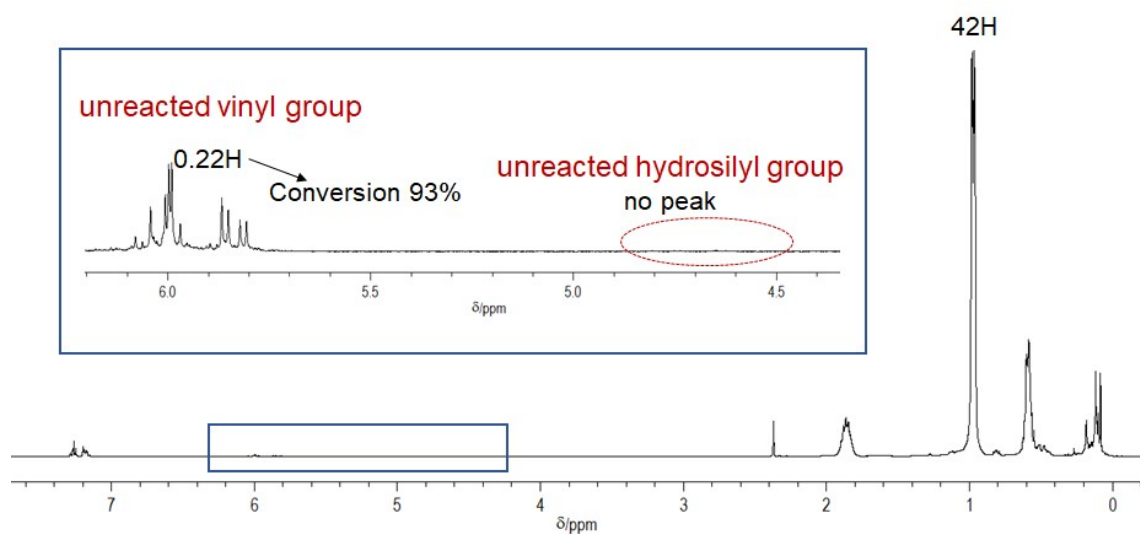

**Figure S14.**  $^1\text{H}$ -NMR spectrum (400 MHz in  $\text{CDCl}_3$ ) of crude product after hydrosilylation polymerization.

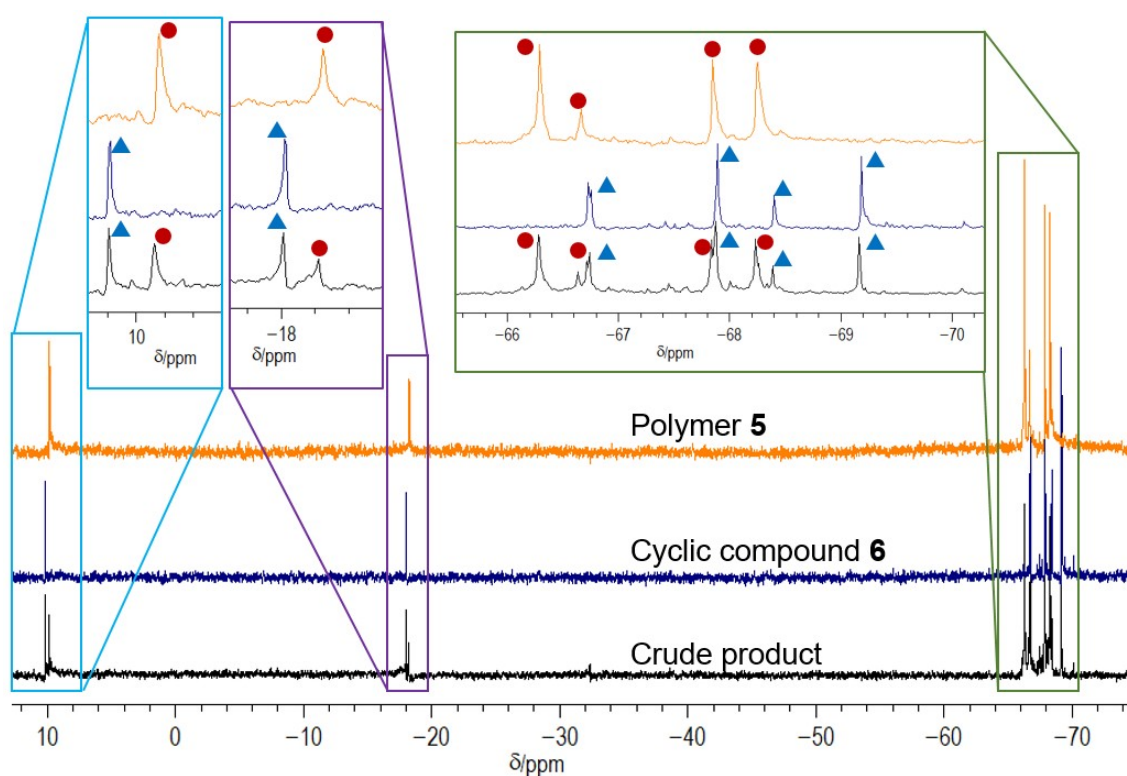

**Figure S15.**  $^{29}\text{Si}$ -NMR spectra (80 MHz in  $\text{CDCl}_3$ ) of polymer **5** (top), cyclic compound **6** (middle), and crude product after hydrosilylation polymerization (bottom).

## 2. MALDI-TOF-MS

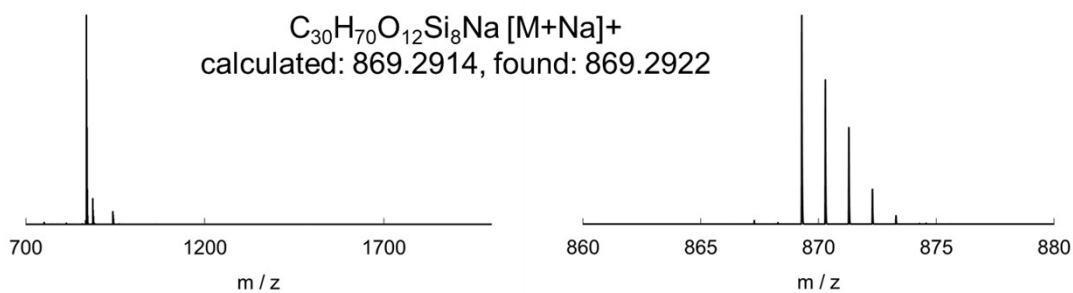

**Figure S16.** MALDI-TOF-MS spectrum of **2**. Matrix: DCTB (20 mg/mL in  $CHCl_3$ ), cationizing agents: TFANa (1 mg/mL in THF).

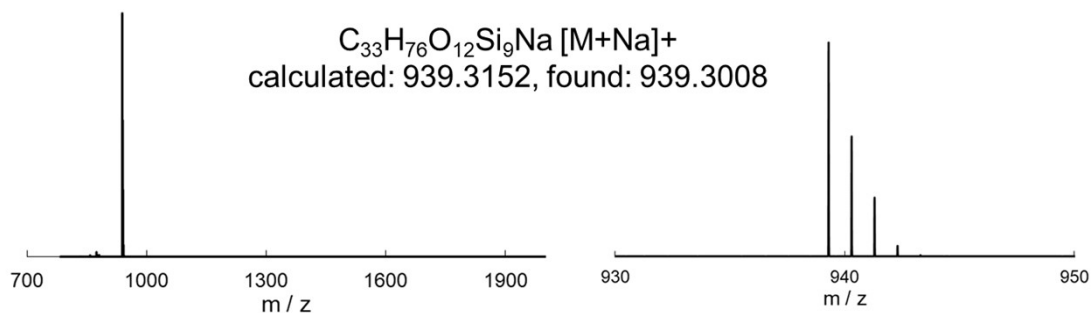

**Figure S17.** MALDI-TOF-MS spectrum of **4**. Matrix: DCTB (20 mg/mL in  $CHCl_3$ ), cationizing agents: TFANa (1 mg/mL in THF).

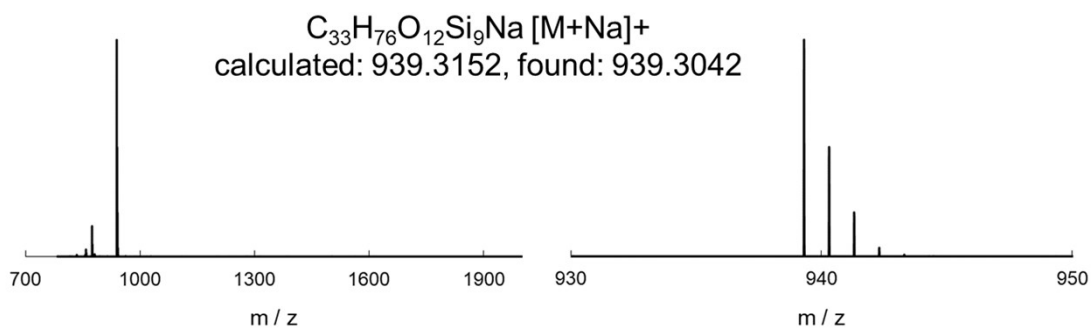

**Figure S18.** MALDI-TOF-MS spectrum of **6**. Matrix: DCTB (20 mg/mL in  $CHCl_3$ ), cationizing agents: TFANa (1 mg/mL in THF).

### 3. SEC traces

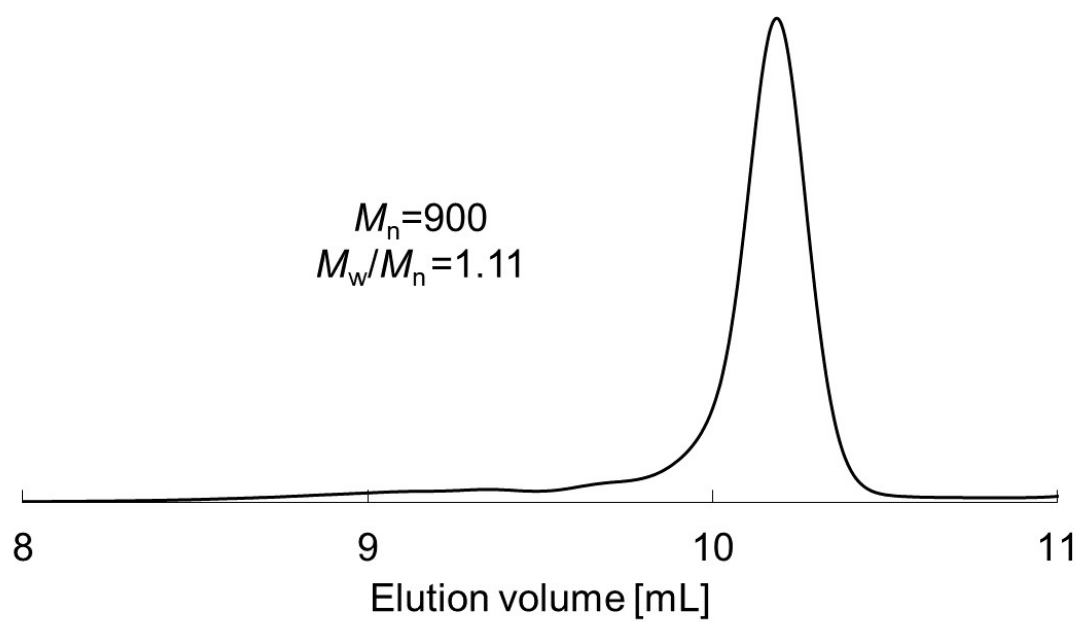

**Figure S19.** SEC traces (1 mL/min in THF, RI detector) of **2**.

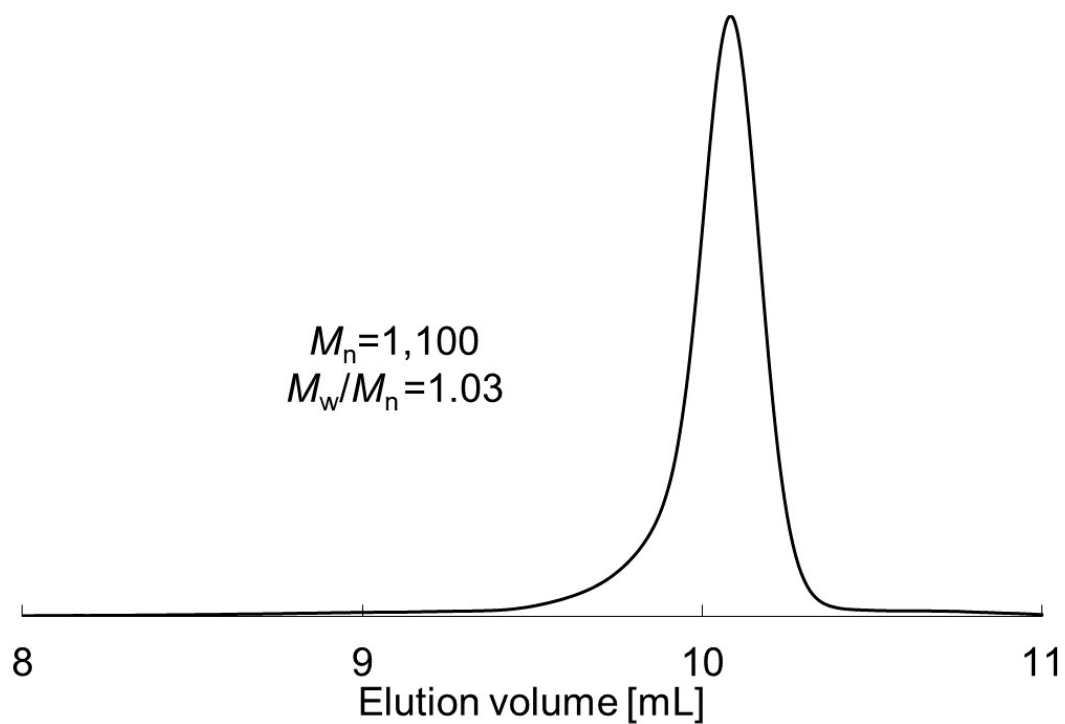

**Figure S20.** SEC traces (1 mL/min in THF, RI detector) of **3**.

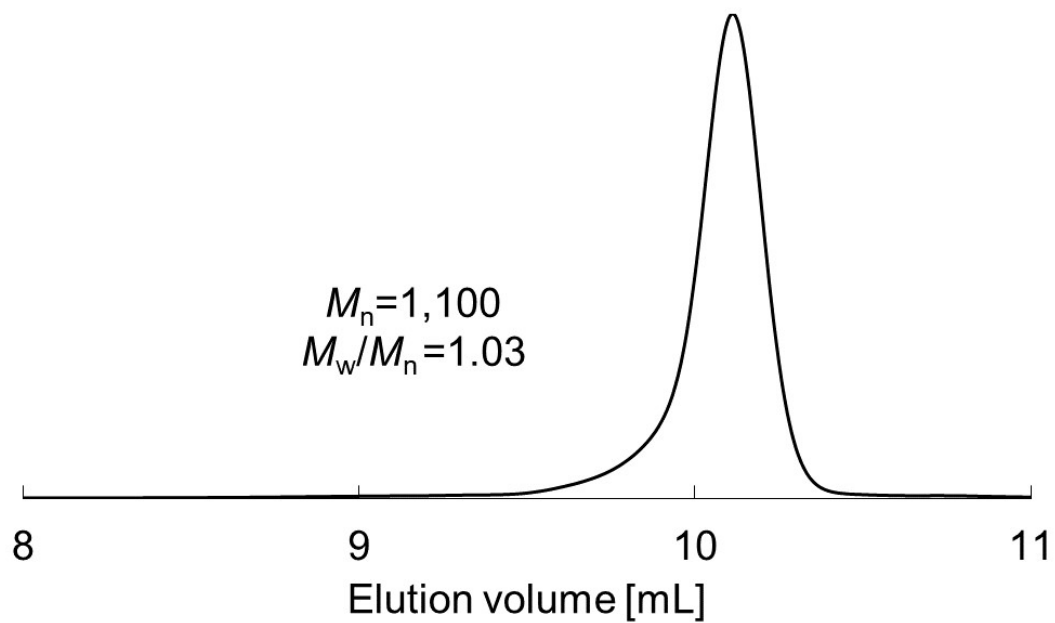

**Figure S21.** SEC traces (1 mL/min in THF, RI detector) of **4**.

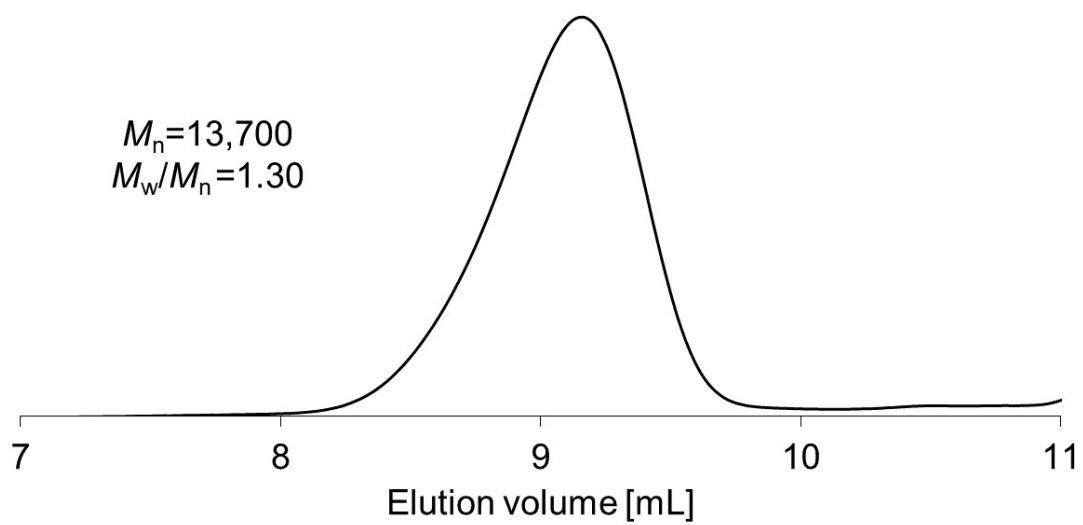

**Figure S22.** SEC traces (1 mL/min in THF, RI detector) of **5**.

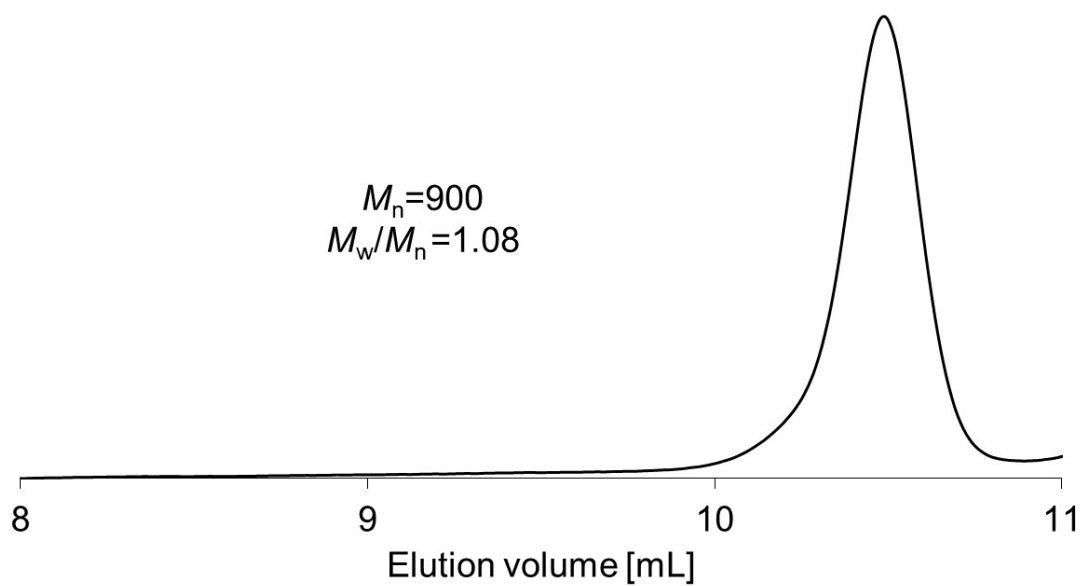

**Figure S23.** SEC traces (1 mL/min in THF, RI detector) of **6**.

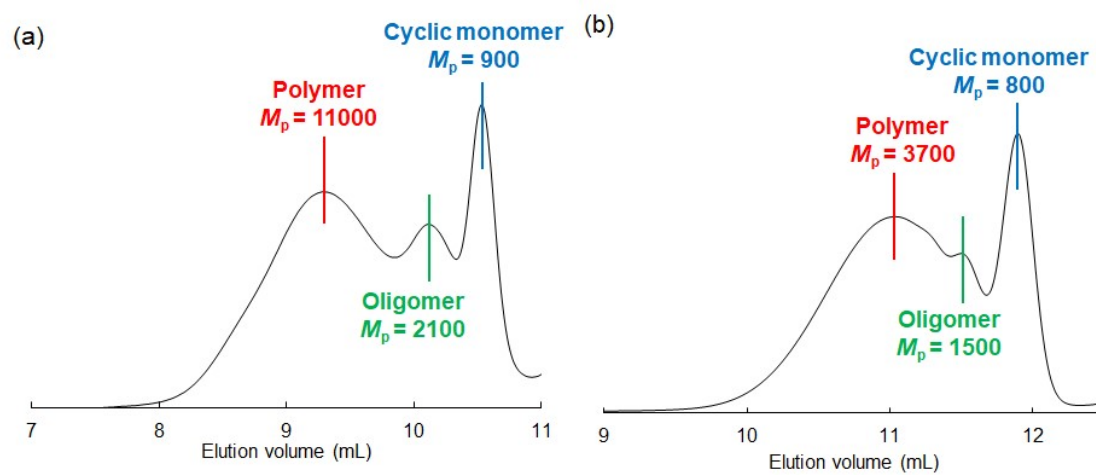

**Figure S24.** SEC traces (1 mL/min in THF, RI detector) of crude products obtained by using (a) the Karstedt catalyst and (b) Wilkinson catalyst.

#### 4. Substrate scope

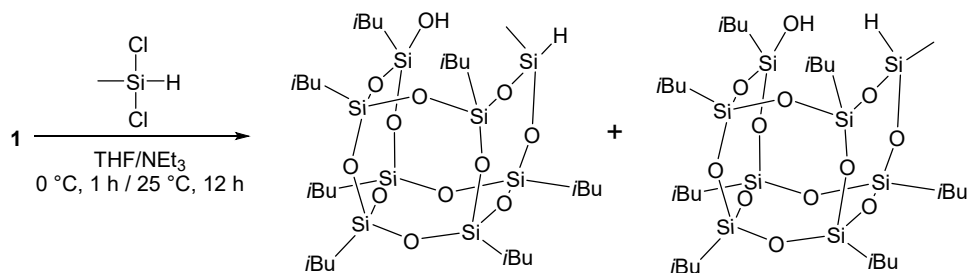

**Scheme S1.** Cyclization between **1** and dichloromethylsilane.

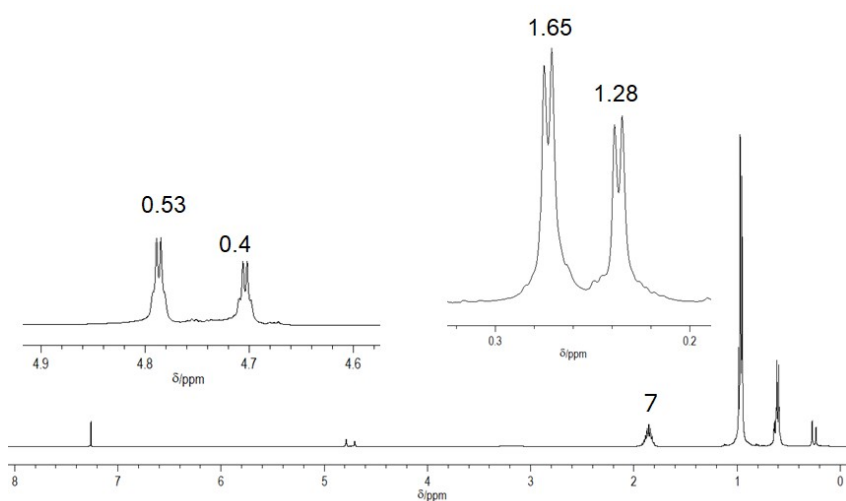

**Figure S25.**  $^1\text{H-NMR}$  spectrum (400 MHz in  $\text{CDCl}_3$ ) of the products of Scheme S1. The integral ratio of the two isomers was ca. 57/43.

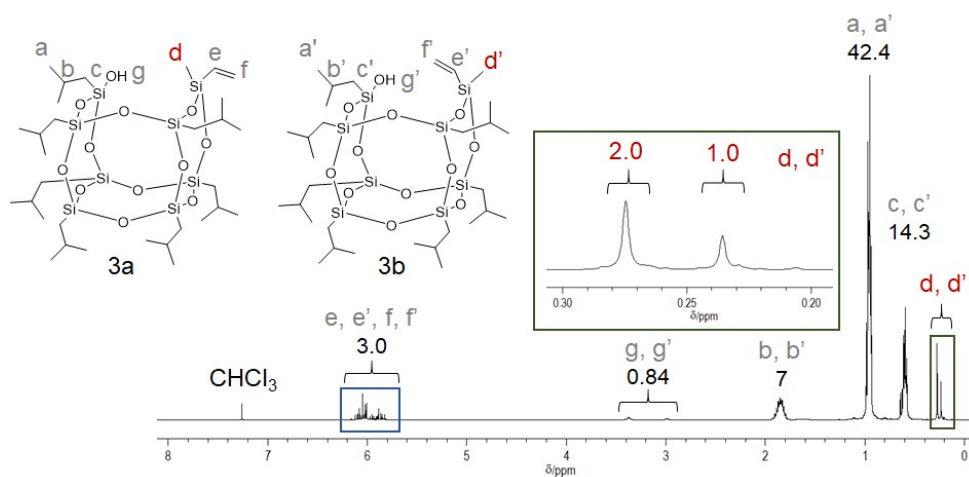

**Figure S26.**  $^1\text{H-NMR}$  spectrum (400 MHz in  $\text{CDCl}_3$ ) of **3a/3b**. The integral ratio of the two isomers was ca. 67/33, judging from the signals due to the methyl groups ( $d$  and  $d'$ ).



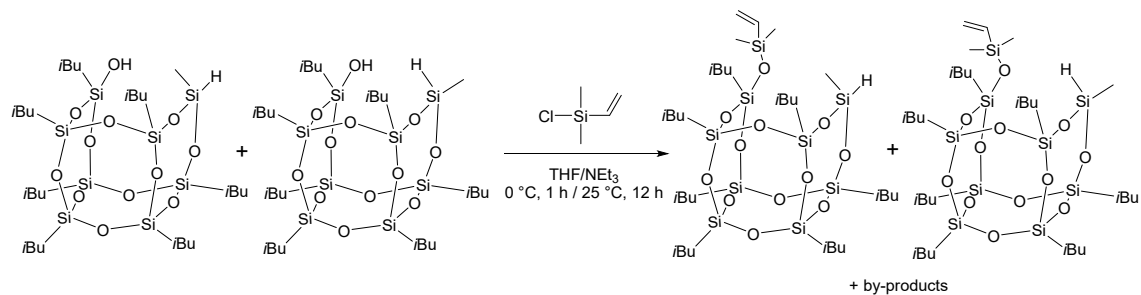

**Scheme S2.** Condensation of the product of Scheme S1 with chlorodimethylvinylsilane.

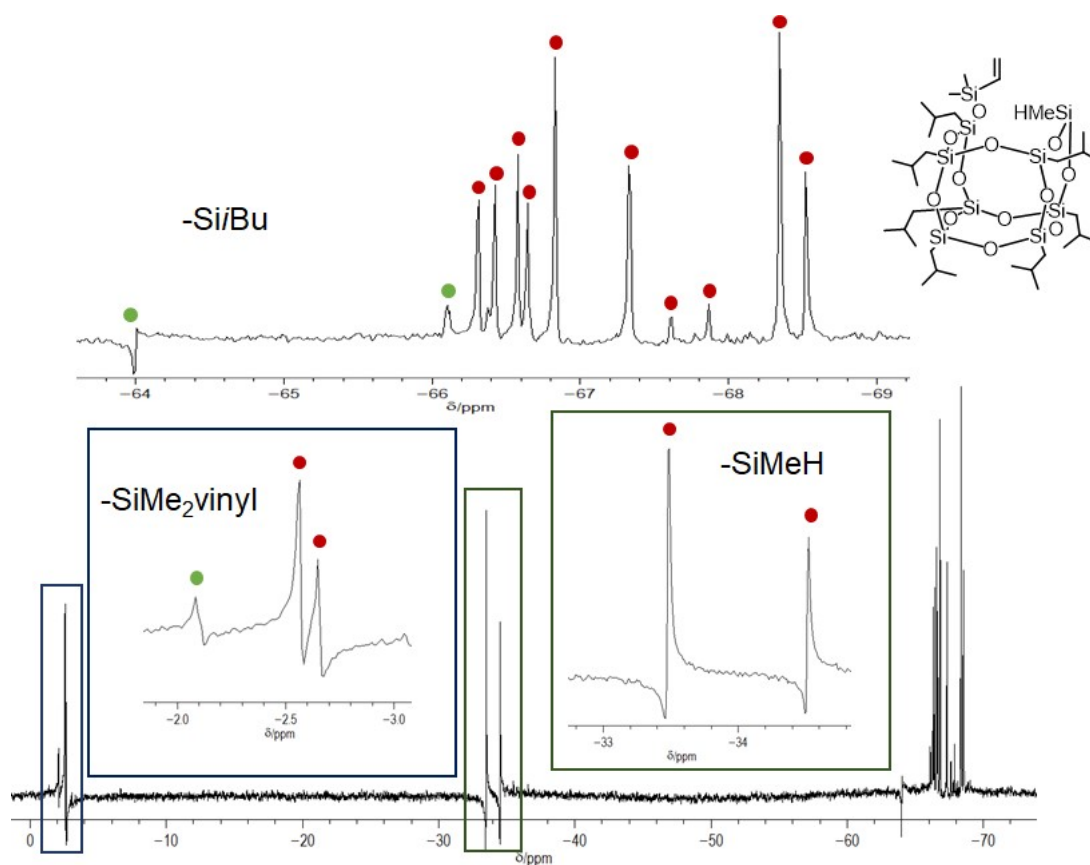

**Figure S27.** <sup>29</sup>Si-NMR (80 MHz in CDCl<sub>3</sub>) of the product of Scheme S2. Red and green dots indicate the target compound and by-products, respectively.

## 5. DFT calculations

### Cartesian coordinates in the structures optimized by DFT calculations

Optimized by B3LYP/6-31G(d)

Model of **4a**:  $E = -3987.2552$  hartree

| Number | Atom | X        | Y        | Z        |
|--------|------|----------|----------|----------|
| 1      | Si   | 1.006626 | -2.98195 | -0.34827 |
| 2      | Si   | -2.67432 | -0.87518 | 0.858919 |
| 3      | O    | -0.25217 | -2.62237 | -1.34802 |
| 4      | Si   | -1.30834 | -1.49355 | -1.92284 |
| 5      | O    | -0.48813 | -0.13916 | -2.36614 |
| 6      | Si   | 0.647004 | 1.025939 | -2.12929 |
| 7      | O    | 2.116463 | 0.324405 | -1.87198 |
| 8      | Si   | 3.070312 | -0.67233 | -0.97142 |
| 9      | O    | 2.342014 | -2.14414 | -0.82401 |
| 10     | Si   | 0.131099 | -1.36539 | 2.228928 |
| 11     | Si   | 0.732956 | 2.907564 | 0.409324 |
| 12     | Si   | 2.529588 | 0.731345 | 1.787407 |
| 13     | O    | -1.24073 | -0.66467 | 1.646974 |
| 14     | O    | 1.286746 | -0.20595 | 2.321597 |
| 15     | O    | 1.938802 | 2.182603 | 1.286882 |
| 16     | C    | -2.20228 | -2.1796  | -3.39988 |
| 17     | C    | 0.742071 | 2.10748  | -3.63844 |
| 18     | C    | -3.59933 | -2.33251 | 1.565131 |
| 19     | C    | 1.360194 | -4.80279 | -0.42189 |
| 20     | C    | 4.718734 | -0.8785  | -1.79914 |
| 21     | C    | 3.752044 | 1.004336 | 3.159087 |
| 22     | O    | 0.209027 | 1.888989 | -0.79574 |
| 23     | O    | 0.608269 | -2.56051 | 1.196571 |
| 24     | O    | 3.283189 | -0.02259 | 0.528583 |
| 25     | O    | -2.40179 | -1.12496 | -0.74938 |
| 26     | H    | -2.91856 | -1.45086 | -3.79424 |
| 27     | H    | -2.75276 | -3.08865 | -3.13527 |
| 28     | H    | -1.49711 | -2.42942 | -4.19971 |
| 29     | H    | 1.03154  | 1.526058 | -4.52029 |

|    |    |          |          |          |
|----|----|----------|----------|----------|
| 30 | H  | -0.22696 | 2.575376 | -3.84314 |
| 31 | H  | 1.481884 | 2.902794 | -3.49676 |
| 32 | H  | -4.54935 | -2.48316 | 1.040601 |
| 33 | H  | -3.01571 | -3.25551 | 1.469715 |
| 34 | H  | -3.82269 | -2.1793  | 2.626772 |
| 35 | H  | 1.628724 | -5.10529 | -1.43957 |
| 36 | H  | 2.191872 | -5.06335 | 0.241227 |
| 37 | H  | 0.484197 | -5.3835  | -0.11413 |
| 38 | H  | 4.602095 | -1.32444 | -2.79253 |
| 39 | H  | 5.217459 | 0.089405 | -1.91626 |
| 40 | H  | 5.371943 | -1.52907 | -1.20805 |
| 41 | H  | 4.577566 | 1.641702 | 2.824854 |
| 42 | H  | 4.174505 | 0.053131 | 3.500024 |
| 43 | H  | 3.272126 | 1.490756 | 4.014975 |
| 44 | C  | -0.15082 | -2.09197 | 3.917205 |
| 45 | H  | -0.47581 | -1.31844 | 4.62133  |
| 46 | H  | -0.9205  | -2.87093 | 3.888695 |
| 47 | H  | 0.769145 | -2.5409  | 4.306878 |
| 48 | C  | -0.73207 | 3.269817 | 1.507594 |
| 49 | H  | -1.49981 | 3.842722 | 0.97482  |
| 50 | H  | -1.1883  | 2.334081 | 1.849332 |
| 51 | H  | -0.42947 | 3.849264 | 2.387078 |
| 52 | O  | -3.55326 | 0.489139 | 1.044789 |
| 53 | Si | -4.41622 | 1.758186 | 0.398914 |
| 54 | C  | -3.70247 | 2.279638 | -1.26071 |
| 55 | H  | -3.85809 | 1.502509 | -2.01787 |
| 56 | H  | -4.17785 | 3.201223 | -1.61959 |
| 57 | H  | -2.62384 | 2.455528 | -1.18542 |
| 58 | C  | -6.22493 | 1.263157 | 0.236997 |
| 59 | H  | -6.83007 | 2.107159 | -0.11727 |
| 60 | H  | -6.35161 | 0.439935 | -0.47649 |
| 61 | H  | -6.6357  | 0.939302 | 1.20005  |
| 62 | H  | -4.30633 | 2.882134 | 1.370898 |
| 63 | C  | 1.469075 | 4.441402 | -0.36007 |
| 64 | H  | 0.822971 | 5.068039 | -0.98068 |
| 65 | C  | 2.740663 | 4.827797 | -0.19593 |

|    |   |          |          |          |
|----|---|----------|----------|----------|
| 66 | H | 3.435203 | 4.251542 | 0.411721 |
| 67 | H | 3.144575 | 5.729273 | -0.65586 |

---

Model of **4b**:  $E = -3987.2544$  hartree

| Number | Atom | X        | Y        | Z        |
|--------|------|----------|----------|----------|
| 1      | Si   | -1.8097  | -2.64859 | -0.27932 |
| 2      | Si   | 2.326065 | -1.21416 | -1.01194 |
| 3      | O    | -0.55427 | -2.87481 | 0.764174 |
| 4      | Si   | 0.734945 | -2.18473 | 1.527868 |
| 5      | O    | 0.279855 | -0.76168 | 2.207818 |
| 6      | Si   | -0.56012 | 0.639885 | 2.369253 |
| 7      | O    | -2.14899 | 0.37358  | 2.013819 |
| 8      | Si   | -3.28016 | -0.12075 | 0.922173 |
| 9      | O    | -2.91971 | -1.64553 | 0.408024 |
| 10     | Si   | -0.46563 | -0.71183 | -2.39807 |
| 11     | Si   | -0.10147 | 3.051934 | 0.321707 |
| 12     | Si   | -2.33669 | 1.723841 | -1.44393 |
| 13     | O    | 0.99857  | -0.4917  | -1.67245 |
| 14     | O    | -1.33116 | 0.666044 | -2.20767 |
| 15     | O    | -1.44018 | 2.841985 | -0.6392  |
| 16     | C    | 1.364565 | -3.33892 | 2.840082 |
| 17     | C    | -0.41876 | 1.23904  | 4.123839 |
| 18     | C    | 2.999117 | -2.52048 | -2.16035 |
| 19     | C    | -2.60277 | -4.2834  | -0.65905 |
| 20     | C    | -4.95763 | -0.11888 | 1.717095 |
| 21     | C    | -3.42138 | 2.57612  | -2.6875  |
| 22     | O    | 0.059111 | 1.737667 | 1.317445 |
| 23     | O    | -1.23995 | -1.97516 | -1.67415 |
| 24     | O    | -3.28225 | 0.899012 | -0.37228 |
| 25     | O    | 1.934389 | -1.9152  | 0.430671 |
| 26     | C    | -0.38739 | 4.599141 | 1.33649  |
| 27     | H    | 2.224475 | -2.90357 | 3.360308 |
| 28     | H    | 1.678199 | -4.29261 | 2.402445 |
| 29     | H    | 0.586711 | -3.5453  | 3.582931 |
| 30     | H    | -0.81482 | 0.495831 | 4.824152 |

|    |    |          |          |          |
|----|----|----------|----------|----------|
| 31 | H  | 0.62824  | 1.427694 | 4.384377 |
| 32 | H  | -0.97789 | 2.170094 | 4.267312 |
| 33 | H  | 3.87705  | -3.00889 | -1.72324 |
| 34 | H  | 2.25071  | -3.29656 | -2.35811 |
| 35 | H  | 3.299415 | -2.08413 | -3.11944 |
| 36 | H  | -2.98496 | -4.75078 | 0.254612 |
| 37 | H  | -3.44064 | -4.1568  | -1.35276 |
| 38 | H  | -1.88202 | -4.96946 | -1.11639 |
| 39 | H  | -4.98308 | -0.80034 | 2.573988 |
| 40 | H  | -5.21803 | 0.884184 | 2.071194 |
| 41 | H  | -5.72559 | -0.43829 | 1.004698 |
| 42 | H  | -4.08434 | 3.295625 | -2.19538 |
| 43 | H  | -4.04366 | 1.852682 | -3.22499 |
| 44 | H  | -2.81623 | 3.118621 | -3.42159 |
| 45 | H  | 0.438164 | 4.783022 | 2.032945 |
| 46 | H  | -1.30828 | 4.498349 | 1.922494 |
| 47 | H  | -0.50009 | 5.483599 | 0.699365 |
| 48 | C  | -0.26784 | -1.07218 | -4.21169 |
| 49 | H  | 0.25152  | -0.24925 | -4.71456 |
| 50 | H  | 0.310296 | -1.98858 | -4.37276 |
| 51 | H  | -1.24404 | -1.20055 | -4.69152 |
| 52 | Si | 4.53483  | 0.48976  | 0.396179 |
| 53 | O  | 3.449193 | -0.04734 | -0.75579 |
| 54 | C  | 5.694722 | -0.91036 | 0.889055 |
| 55 | H  | 6.280438 | -1.26735 | 0.033352 |
| 56 | H  | 6.400266 | -0.57893 | 1.661254 |
| 57 | H  | 5.135292 | -1.76194 | 1.293307 |
| 58 | C  | 5.482319 | 1.932676 | -0.34345 |
| 59 | H  | 6.227607 | 2.31355  | 0.365841 |
| 60 | H  | 6.009033 | 1.635823 | -1.25798 |
| 61 | H  | 4.805277 | 2.756426 | -0.59308 |
| 62 | H  | 3.787806 | 0.942919 | 1.60339  |
| 63 | C  | 1.424913 | 3.143581 | -0.74164 |
| 64 | H  | 1.757241 | 2.22748  | -1.233   |
| 65 | C  | 2.123046 | 4.267336 | -0.95163 |
| 66 | H  | 1.854045 | 5.216168 | -0.48928 |

|    |   |          |          |          |
|----|---|----------|----------|----------|
| 67 | H | 2.998598 | 4.299246 | -1.59958 |
|----|---|----------|----------|----------|

---

Model of cyclic compound **6'**:  $E = -3987.2669$  hartree

| Number | Atom | X        | Y        | Z        |
|--------|------|----------|----------|----------|
| 1      | Si   | -2.69519 | 1.823702 | 0.537457 |
| 2      | Si   | 1.772265 | 1.425692 | 1.332717 |
| 3      | O    | -1.5197  | 2.645403 | -0.27175 |
| 4      | Si   | -0.00896 | 2.73305  | -0.92589 |
| 5      | O    | 0.137592 | 1.575682 | -2.09751 |
| 6      | Si   | -0.06738 | -0.05748 | -2.20242 |
| 7      | O    | -1.67531 | -0.41428 | -2.26168 |
| 8      | Si   | -3.03611 | -0.67833 | -1.37161 |
| 9      | O    | -3.32257 | 0.640543 | -0.42383 |
| 10     | Si   | -0.94286 | 0.014321 | 2.395032 |
| 11     | Si   | 1.099143 | -2.16684 | -0.19094 |
| 12     | Si   | -1.6862  | -2.62618 | 0.623674 |
| 13     | O    | 0.571846 | 0.493766 | 1.973601 |
| 14     | O    | -1.28802 | -1.44088 | 1.704175 |
| 15     | O    | -0.3049  | -3.08798 | -0.1843  |
| 16     | C    | 0.242578 | 4.409465 | -1.68309 |
| 17     | C    | 0.662352 | -0.64777 | -3.81182 |
| 18     | C    | 2.561837 | 2.419476 | 2.697891 |
| 19     | C    | -4.04713 | 2.994433 | 1.034788 |
| 20     | C    | -4.48668 | -0.96755 | -2.49235 |
| 21     | C    | -2.42222 | -4.09269 | 1.494514 |
| 22     | O    | 0.594098 | -0.7012  | -0.82881 |
| 23     | O    | -2.03846 | 1.134104 | 1.884309 |
| 24     | O    | -2.80038 | -2.01577 | -0.43002 |
| 25     | O    | 1.127708 | 2.477959 | 0.237176 |
| 26     | C    | 2.542073 | -2.68898 | -1.28692 |
| 27     | H    | 1.236269 | 4.485587 | -2.13707 |
| 28     | H    | 0.153086 | 5.196146 | -0.92648 |
| 29     | H    | -0.50358 | 4.598651 | -2.46199 |
| 30     | H    | 0.038398 | -0.27631 | -4.63256 |
| 31     | H    | 1.679569 | -0.28035 | -3.97488 |

|    |    |          |          |          |
|----|----|----------|----------|----------|
| 32 | H  | 0.673368 | -1.74123 | -3.87397 |
| 33 | H  | 3.357049 | 3.062548 | 2.304723 |
| 34 | H  | 1.823916 | 3.061116 | 3.191992 |
| 35 | H  | 3.002088 | 1.763309 | 3.45695  |
| 36 | H  | -4.49058 | 3.472478 | 0.154908 |
| 37 | H  | -4.84146 | 2.464335 | 1.570794 |
| 38 | H  | -3.65906 | 3.780978 | 1.690554 |
| 39 | H  | -4.65942 | -0.0991  | -3.13665 |
| 40 | H  | -4.31396 | -1.83945 | -3.13196 |
| 41 | H  | -5.397   | -1.14713 | -1.91059 |
| 42 | H  | -2.66239 | -4.88407 | 0.776338 |
| 43 | H  | -3.34441 | -3.81504 | 2.01578  |
| 44 | H  | -1.72218 | -4.50356 | 2.229673 |
| 45 | H  | 2.215533 | -3.12868 | -2.23846 |
| 46 | H  | 3.103501 | -3.47529 | -0.76612 |
| 47 | C  | -1.05955 | -0.15166 | 4.243809 |
| 48 | H  | -0.33122 | -0.87881 | 4.619174 |
| 49 | H  | -0.86317 | 0.807744 | 4.734494 |
| 50 | H  | -2.05868 | -0.48712 | 4.541861 |
| 51 | C  | 3.476736 | -1.4718  | -1.5807  |
| 52 | H  | 4.396952 | -1.84444 | -2.05952 |
| 53 | H  | 3.000345 | -0.84696 | -2.34432 |
| 54 | C  | 1.755737 | -2.32231 | 1.569767 |
| 55 | H  | 2.571959 | -1.64606 | 1.81866  |
| 56 | H  | 0.979872 | -2.21276 | 2.326338 |
| 57 | H  | 2.135765 | -3.35189 | 1.636967 |
| 58 | O  | 2.907658 | 0.478507 | 0.6279   |
| 59 | Si | 4.117015 | -0.22657 | -0.27724 |
| 60 | C  | 4.989545 | 1.135993 | -1.248   |
| 61 | H  | 5.432076 | 1.87705  | -0.57175 |
| 62 | H  | 5.796039 | 0.73556  | -1.87454 |
| 63 | H  | 4.287929 | 1.664912 | -1.90391 |
| 64 | C  | 5.337469 | -1.04182 | 0.909353 |
| 65 | H  | 6.198316 | -1.44334 | 0.359952 |
| 66 | H  | 5.718813 | -0.31479 | 1.636241 |
| 67 | H  | 4.889203 | -1.86862 | 1.470827 |

---

Model of cyclic compound **6**:  $E = -3987.2981$  hartree

| Number | Atom | X        | Y        | Z        |
|--------|------|----------|----------|----------|
| 1      | Si   | -2.15326 | -2.40636 | 0.050163 |
| 2      | Si   | 2.296953 | -1.90521 | -0.47949 |
| 3      | O    | -1.04775 | -2.44876 | 1.273222 |
| 4      | Si   | 0.279893 | -1.74283 | 1.950897 |
| 5      | O    | 0.049915 | -0.11591 | 2.038045 |
| 6      | Si   | -0.84948 | 1.249773 | 2.241961 |
| 7      | O    | -2.383   | 0.971887 | 1.706162 |
| 8      | Si   | -3.36783 | 0.466451 | 0.48525  |
| 9      | O    | -3.20718 | -1.16515 | 0.301014 |
| 10     | Si   | -0.30812 | -1.26208 | -2.2472  |
| 11     | Si   | 0.384499 | 3.046087 | -0.0863  |
| 12     | Si   | -1.71689 | 1.63547  | -1.93788 |
| 13     | O    | 1.17966  | -1.3497  | -1.55918 |
| 14     | O    | -0.78081 | 0.309158 | -2.21535 |
| 15     | O    | -0.78532 | 2.800995 | -1.24747 |
| 16     | C    | 0.565345 | -2.4737  | 3.636303 |
| 17     | C    | -0.91075 | 1.744256 | 4.033466 |
| 18     | C    | 2.915402 | -3.58323 | -0.99663 |
| 19     | C    | -3.09061 | -4.00789 | 0.002688 |
| 20     | C    | -5.13225 | 0.868116 | 0.898415 |
| 21     | C    | -2.43305 | 2.280702 | -3.52652 |
| 22     | O    | -0.15464 | 2.449443 | 1.367977 |
| 23     | O    | -1.36937 | -2.18309 | -1.38423 |
| 24     | O    | -2.94472 | 1.218741 | -0.9184  |
| 25     | O    | 1.601882 | -2.01992 | 1.015183 |
| 26     | C    | 0.60529  | 4.89325  | 0.113743 |
| 27     | H    | 1.441361 | -2.02151 | 4.113549 |
| 28     | H    | 0.737185 | -3.55314 | 3.566814 |
| 29     | H    | -0.30025 | -2.31099 | 4.28773  |
| 30     | H    | -1.37816 | 0.962594 | 4.642246 |
| 31     | H    | 0.097085 | 1.922948 | 4.423374 |
| 32     | H    | -1.4912  | 2.664201 | 4.161232 |



|    |    |          |          |          |
|----|----|----------|----------|----------|
| 33 | H  | 3.656068 | -3.96178 | -0.28391 |
| 34 | H  | 2.093934 | -4.30682 | -1.04528 |
| 35 | H  | 3.388686 | -3.53819 | -1.98352 |
| 36 | H  | -3.61642 | -4.17827 | 0.948096 |
| 37 | H  | -3.83282 | -3.99972 | -0.80252 |
| 38 | H  | -2.41279 | -4.85117 | -0.16678 |
| 39 | H  | -5.4357  | 0.377296 | 1.829164 |
| 40 | H  | -5.26407 | 1.948054 | 1.023486 |
| 41 | H  | -5.80453 | 0.532837 | 0.101606 |
| 42 | H  | -3.03962 | 3.173935 | -3.34305 |
| 43 | H  | -3.07176 | 1.52926  | -4.00315 |
| 44 | H  | -1.63828 | 2.549592 | -4.23055 |
| 45 | H  | 1.367586 | 5.121007 | 0.867829 |
| 46 | H  | -0.33258 | 5.361685 | 0.43203  |
| 47 | H  | 0.912125 | 5.358769 | -0.82987 |
| 48 | C  | -0.24347 | -1.88058 | -3.99946 |
| 49 | H  | 0.462869 | -1.29023 | -4.59303 |
| 50 | H  | 0.077365 | -2.9274  | -4.03294 |
| 51 | H  | -1.22758 | -1.81358 | -4.47585 |
| 52 | Si | 4.295306 | 0.57153  | 0.011536 |
| 53 | C  | 1.936796 | 2.12232  | -0.61156 |
| 54 | H  | 1.592407 | 1.180147 | -1.05605 |
| 55 | H  | 2.409277 | 2.675899 | -1.43601 |
| 56 | C  | 2.972914 | 1.832164 | 0.503921 |
| 57 | H  | 2.460435 | 1.435296 | 1.390751 |
| 58 | H  | 3.459736 | 2.762937 | 0.830873 |
| 59 | O  | 3.54506  | -0.85581 | -0.43264 |
| 60 | C  | 5.432491 | 0.206568 | 1.470554 |
| 61 | H  | 6.174376 | -0.55851 | 1.212888 |
| 62 | H  | 5.976864 | 1.1049   | 1.787623 |
| 63 | H  | 4.862857 | -0.15992 | 2.33268  |
| 64 | C  | 5.294285 | 1.155649 | -1.47552 |
| 65 | H  | 5.841135 | 2.080043 | -1.25116 |
| 66 | H  | 6.02829  | 0.398984 | -1.77649 |
| 67 | H  | 4.646754 | 1.350325 | -2.33804 |

---

Model of dimer **7a**:  $E = -7974.5547$  hartree

| Number | Atom | X        | Y        | Z        |
|--------|------|----------|----------|----------|
| 1      | Si   | -7.19714 | -0.11331 | 1.856134 |
| 2      | Si   | -5.15579 | 2.784963 | -0.72139 |
| 3      | O    | -7.5511  | 0.199025 | 0.277385 |
| 4      | Si   | -7.02064 | 0.309061 | -1.28107 |
| 5      | O    | -6.07164 | -0.98201 | -1.63903 |
| 6      | Si   | -4.90615 | -2.10164 | -1.34005 |
| 7      | O    | -5.25231 | -2.89624 | 0.064993 |
| 8      | Si   | -5.44809 | -2.74603 | 1.695132 |
| 9      | O    | -6.64774 | -1.65754 | 2.004936 |
| 10     | Si   | -4.52384 | 1.556897 | 2.11976  |
| 11     | Si   | -1.90708 | -1.19956 | -0.64426 |
| 12     | Si   | -2.79464 | -1.14097 | 2.360605 |
| 13     | O    | -4.39979 | 2.073976 | 0.560018 |
| 14     | O    | -3.39218 | 0.395127 | 2.354618 |
| 15     | O    | -1.87989 | -1.3715  | 1.01355  |
| 16     | C    | -8.47901 | 0.34146  | -2.43158 |
| 17     | C    | -4.87254 | -3.32724 | -2.73838 |
| 18     | C    | -6.13954 | 4.266732 | -0.15873 |
| 19     | C    | -8.72415 | 0.103203 | 2.889476 |
| 20     | C    | -5.90818 | -4.39262 | 2.418254 |
| 21     | C    | -1.75467 | -1.39849 | 3.878206 |
| 22     | O    | -3.47092 | -1.32309 | -1.18616 |
| 23     | O    | -6.03432 | 0.940992 | 2.366149 |
| 24     | O    | -4.04643 | -2.21422 | 2.375294 |
| 25     | O    | -6.15758 | 1.701014 | -1.46047 |
| 26     | H    | -8.15033 | 0.432696 | -3.4724  |
| 27     | H    | -9.13551 | 1.18869  | -2.20645 |
| 28     | H    | -9.06693 | -0.57807 | -2.34054 |
| 29     | H    | -5.84142 | -3.82734 | -2.84218 |
| 30     | H    | -4.64545 | -2.82736 | -3.6862  |
| 31     | H    | -4.11172 | -4.09688 | -2.56855 |
| 32     | H    | -6.65581 | 4.735673 | -1.00373 |
| 33     | H    | -6.89855 | 3.981112 | 0.578828 |

|    |    |          |          |          |
|----|----|----------|----------|----------|
| 34 | H  | -5.48877 | 5.020923 | 0.297644 |
| 35 | H  | -9.50951 | -0.59063 | 2.571488 |
| 36 | H  | -8.50807 | -0.08847 | 3.945832 |
| 37 | H  | -9.11445 | 1.122609 | 2.80109  |
| 38 | H  | -6.84526 | -4.75892 | 1.985826 |
| 39 | H  | -5.1281  | -5.13523 | 2.219896 |
| 40 | H  | -6.03936 | -4.31821 | 3.502939 |
| 41 | H  | -1.30778 | -2.3983  | 3.88076  |
| 42 | H  | -2.36291 | -1.29669 | 4.783523 |
| 43 | H  | -0.94424 | -0.66368 | 3.929236 |
| 44 | C  | -4.232   | 2.953665 | 3.312578 |
| 45 | H  | -3.23867 | 3.389988 | 3.161791 |
| 46 | H  | -4.97534 | 3.747473 | 3.181084 |
| 47 | H  | -4.29439 | 2.601234 | 4.347757 |
| 48 | C  | -1.27024 | 0.49815  | -1.09862 |
| 49 | H  | -1.21445 | 0.617391 | -2.18707 |
| 50 | H  | -1.94414 | 1.268895 | -0.70904 |
| 51 | H  | -0.27047 | 0.666184 | -0.68231 |
| 52 | O  | -4.00196 | 3.248996 | -1.78536 |
| 53 | Si | -3.49305 | 3.210811 | -3.37251 |
| 54 | C  | -4.82942 | 3.909539 | -4.49927 |
| 55 | H  | -5.05105 | 4.956313 | -4.25896 |
| 56 | H  | -4.51665 | 3.866896 | -5.55009 |
| 57 | H  | -5.75986 | 3.337921 | -4.40493 |
| 58 | C  | -1.90769 | 4.213199 | -3.4814  |
| 59 | H  | -1.50044 | 4.194537 | -4.49989 |
| 60 | H  | -2.08246 | 5.260663 | -3.20879 |
| 61 | H  | -1.14183 | 3.8161   | -2.80583 |
| 62 | H  | -3.22122 | 1.798747 | -3.76689 |
| 63 | Si | 1.709765 | -3.93104 | -1.63938 |
| 64 | O  | 3.291128 | -3.61697 | -1.17765 |
| 65 | C  | 1.622786 | -4.02361 | -3.52281 |
| 66 | C  | 1.249818 | -5.5885  | -0.87162 |
| 67 | Si | 4.589146 | -2.65929 | -1.43483 |
| 68 | H  | 2.273373 | -4.81667 | -3.91082 |
| 69 | H  | 0.603752 | -4.23505 | -3.86913 |

|     |    |          |          |          |
|-----|----|----------|----------|----------|
| 70  | H  | 1.941326 | -3.07794 | -3.9771  |
| 71  | H  | 0.215645 | -5.86848 | -1.10659 |
| 72  | H  | 1.902603 | -6.38832 | -1.24043 |
| 73  | H  | 1.348088 | -5.5556  | 0.219664 |
| 74  | O  | 5.154011 | -2.15378 | 0.033308 |
| 75  | C  | 5.916588 | -3.60011 | -2.35026 |
| 76  | O  | 4.109694 | -1.35013 | -2.3254  |
| 77  | Si | 6.455588 | -1.50297 | 0.805638 |
| 78  | H  | 5.55776  | -3.92074 | -3.33468 |
| 79  | H  | 6.808672 | -2.9821  | -2.50404 |
| 80  | H  | 6.215751 | -4.49625 | -1.79503 |
| 81  | Si | 4.478745 | 0.207809 | -2.71216 |
| 82  | O  | 5.8936   | -0.58981 | 2.046413 |
| 83  | O  | 7.300944 | -0.56019 | -0.25344 |
| 84  | C  | 7.573379 | -2.83627 | 1.46286  |
| 85  | O  | 6.078714 | 0.476159 | -2.40844 |
| 86  | O  | 3.55939  | 1.23182  | -1.81543 |
| 87  | C  | 4.135366 | 0.496248 | -4.51558 |
| 88  | Si | 5.577489 | 0.786241 | 2.893373 |
| 89  | Si | 7.28242  | 0.709228 | -1.30764 |
| 90  | H  | 7.031991 | -3.48458 | 2.16025  |
| 91  | H  | 7.961915 | -3.4606  | 0.650916 |
| 92  | H  | 8.428167 | -2.40384 | 1.994111 |
| 93  | Si | 3.170642 | 2.074444 | -0.45791 |
| 94  | H  | 3.081981 | 0.303889 | -4.74612 |
| 95  | H  | 4.746227 | -0.16439 | -5.14005 |
| 96  | H  | 4.360089 | 1.531316 | -4.79424 |
| 97  | O  | 3.94952  | 0.931549 | 3.076929 |
| 98  | C  | 6.386783 | 0.719963 | 4.564564 |
| 99  | O  | 6.160864 | 2.086804 | 2.062337 |
| 100 | O  | 7.014636 | 2.110122 | -0.48492 |
| 101 | C  | 8.916307 | 0.813011 | -2.18318 |
| 102 | O  | 4.501863 | 2.874055 | 0.094745 |
| 103 | C  | 1.844794 | 3.313392 | -0.8618  |
| 104 | O  | 2.662625 | 0.997633 | 0.677095 |
| 105 | Si | 2.514067 | 0.642081 | 2.293262 |

|     |    |          |          |          |
|-----|----|----------|----------|----------|
| 106 | H  | 6.155138 | 1.619493 | 5.144826 |
| 107 | H  | 7.475664 | 0.649701 | 4.469332 |
| 108 | H  | 6.03683  | -0.14939 | 5.131375 |
| 109 | Si | 6.061578 | 2.880249 | 0.619738 |
| 110 | H  | 8.927225 | 1.653278 | -2.88543 |
| 111 | H  | 9.731224 | 0.958414 | -1.46617 |
| 112 | H  | 9.11808  | -0.10406 | -2.74676 |
| 113 | H  | 2.190415 | 4.020811 | -1.6233  |
| 114 | H  | 0.946443 | 2.814718 | -1.2411  |
| 115 | H  | 1.564761 | 3.883844 | 0.030445 |
| 116 | C  | 2.056624 | -1.1613  | 2.440818 |
| 117 | C  | 1.24453  | 1.78003  | 3.053328 |
| 118 | C  | 6.65099  | 4.627748 | 0.82943  |
| 119 | H  | 1.046711 | -1.34508 | 2.057958 |
| 120 | H  | 2.75937  | -1.77906 | 1.87026  |
| 121 | H  | 2.08517  | -1.48314 | 3.488207 |
| 122 | H  | 0.230285 | 1.763681 | 2.645362 |
| 123 | C  | 1.496233 | 2.612279 | 4.071908 |
| 124 | H  | 6.615548 | 5.1677   | -0.12266 |
| 125 | H  | 6.023727 | 5.164027 | 1.549325 |
| 126 | H  | 7.683124 | 4.648643 | 1.194919 |
| 127 | H  | 2.484973 | 2.676972 | 4.521417 |
| 128 | H  | 0.734658 | 3.263829 | 4.499638 |
| 129 | C  | 0.619307 | -2.53835 | -0.9757  |
| 130 | H  | 0.71588  | -2.53783 | 0.117702 |
| 131 | H  | 1.060171 | -1.58804 | -1.30868 |
| 132 | C  | -0.87917 | -2.60031 | -1.36695 |
| 133 | H  | -1.32299 | -3.55087 | -1.03615 |
| 134 | H  | -0.99156 | -2.57989 | -2.46063 |

---

Model of dimer **7b**:  $E = -7974.5502$  hartree

| Number | Atom | X        | Y        | Z        |
|--------|------|----------|----------|----------|
| 1      | Si   | 6.589056 | -1.27758 | -2.48015 |
| 2      | Si   | 5.765564 | 2.590702 | -0.60455 |
| 3      | O    | 7.539118 | -0.51122 | -1.37344 |

|    |    |          |          |          |
|----|----|----------|----------|----------|
| 4  | Si | 7.672083 | 0.192548 | 0.112989 |
| 5  | O  | 6.931815 | -0.74222 | 1.241275 |
| 6  | Si | 5.751754 | -1.71782 | 1.83959  |
| 7  | O  | 5.481118 | -2.96099 | 0.788152 |
| 8  | Si | 5.016926 | -3.39427 | -0.73248 |
| 9  | O  | 6.011004 | -2.67757 | -1.83591 |
| 10 | Si | 4.048745 | 0.603185 | -2.35519 |
| 11 | Si | 2.731496 | -0.64709 | 2.047697 |
| 12 | Si | 2.344601 | -1.69858 | -0.90708 |
| 13 | O  | 4.558433 | 1.615103 | -1.15867 |
| 14 | O  | 2.895191 | -0.37603 | -1.72346 |
| 15 | O  | 2.086395 | -1.29716 | 0.662847 |
| 16 | C  | 9.468097 | 0.383112 | 0.549049 |
| 17 | C  | 6.313393 | -2.4145  | 3.470082 |
| 18 | C  | 6.474796 | 3.618329 | -1.9912  |
| 19 | C  | 7.587616 | -1.66056 | -3.99764 |
| 20 | C  | 5.126271 | -5.23878 | -0.91286 |
| 21 | C  | 0.76054  | -2.29068 | -1.67488 |
| 22 | O  | 4.382841 | -0.83254 | 2.008836 |
| 23 | O  | 5.329459 | -0.29142 | -2.8856  |
| 24 | O  | 3.468723 | -2.90243 | -0.9994  |
| 25 | O  | 6.964009 | 1.679241 | 0.071603 |
| 26 | C  | 2.027709 | -1.60766 | 3.495528 |
| 27 | H  | 9.582086 | 0.865999 | 1.525532 |
| 28 | H  | 9.987595 | 0.995659 | -0.19552 |
| 29 | H  | 9.963856 | -0.59249 | 0.592797 |
| 30 | H  | 7.237539 | -2.99023 | 3.351284 |
| 31 | H  | 6.504223 | -1.61149 | 4.190242 |
| 32 | H  | 5.553518 | -3.07897 | 3.895622 |
| 33 | H  | 7.272643 | 4.27269  | -1.62231 |
| 34 | H  | 6.901315 | 2.983237 | -2.77632 |
| 35 | H  | 5.705701 | 4.252102 | -2.4467  |
| 36 | H  | 8.427983 | -2.31886 | -3.75322 |
| 37 | H  | 6.970956 | -2.16153 | -4.75136 |
| 38 | H  | 7.990974 | -0.74436 | -4.4417  |
| 39 | H  | 6.152628 | -5.58498 | -0.75147 |

|    |    |          |          |          |
|----|----|----------|----------|----------|
| 40 | H  | 4.479503 | -5.73928 | -0.18446 |
| 41 | H  | 4.815075 | -5.55074 | -1.91544 |
| 42 | H  | 0.428332 | -3.22176 | -1.20285 |
| 43 | H  | 0.895925 | -2.48473 | -2.74444 |
| 44 | H  | -0.0349  | -1.54797 | -1.55481 |
| 45 | H  | 2.429963 | -1.24665 | 4.449475 |
| 46 | H  | 2.269736 | -2.67331 | 3.40835  |
| 47 | H  | 0.936629 | -1.51628 | 3.530694 |
| 48 | C  | 3.332254 | 1.55408  | -3.78337 |
| 49 | H  | 2.477309 | 2.155391 | -3.45599 |
| 50 | H  | 4.075471 | 2.228024 | -4.22314 |
| 51 | H  | 2.987103 | 0.873567 | -4.56918 |
| 52 | Si | 5.405363 | 4.508837 | 1.880462 |
| 53 | O  | 5.113152 | 3.548492 | 0.551226 |
| 54 | C  | 3.793328 | 5.35862  | 2.337868 |
| 55 | H  | 3.934718 | 6.039181 | 3.186532 |
| 56 | H  | 3.404215 | 5.945551 | 1.498312 |
| 57 | H  | 3.027847 | 4.625285 | 2.617744 |
| 58 | C  | 6.086658 | 3.485418 | 3.302636 |
| 59 | H  | 6.30691  | 4.117853 | 4.171771 |
| 60 | H  | 5.372513 | 2.715069 | 3.616081 |
| 61 | H  | 7.012644 | 2.978795 | 3.009113 |
| 62 | H  | 6.416518 | 5.542161 | 1.50072  |
| 63 | Si | -0.37548 | 1.658359 | 1.320808 |
| 64 | O  | -0.98298 | 0.099451 | 1.303493 |
| 65 | C  | 0.196525 | 2.094731 | -0.41979 |
| 66 | C  | -1.72666 | 2.839049 | 1.901618 |
| 67 | Si | -2.22373 | -0.95601 | 1.286766 |
| 68 | H  | 0.610441 | 3.110542 | -0.45527 |
| 69 | H  | 0.971886 | 1.405492 | -0.77068 |
| 70 | H  | -0.63996 | 2.046276 | -1.12687 |
| 71 | H  | -1.3652  | 3.874803 | 1.925286 |
| 72 | H  | -2.6     | 2.80772  | 1.240475 |
| 73 | H  | -2.06619 | 2.579809 | 2.911412 |
| 74 | O  | -2.82867 | -1.04201 | -0.25501 |
| 75 | C  | -1.63166 | -2.63134 | 1.849268 |

|     |    |          |          |          |
|-----|----|----------|----------|----------|
| 76  | O  | -3.40553 | -0.41178 | 2.306894 |
| 77  | Si | -3.94643 | -1.83294 | -1.1698  |
| 78  | H  | -1.3409  | -2.60726 | 2.905218 |
| 79  | H  | -2.41811 | -3.38613 | 1.735293 |
| 80  | H  | -0.759   | -2.95047 | 1.269819 |
| 81  | Si | -5.01693 | -0.32789 | 2.612506 |
| 82  | O  | -4.80643 | -0.69364 | -1.98343 |
| 83  | O  | -4.94979 | -2.69738 | -0.18437 |
| 84  | C  | -3.11596 | -2.99949 | -2.35757 |
| 85  | O  | -5.7361  | -1.76074 | 2.209684 |
| 86  | O  | -5.65408 | 0.875292 | 1.690582 |
| 87  | C  | -5.28195 | -0.0013  | 4.423576 |
| 88  | Si | -6.12832 | -0.13945 | -2.79864 |
| 89  | Si | -6.17203 | -2.70025 | 0.925411 |
| 90  | H  | -2.42283 | -2.46141 | -3.01283 |
| 91  | H  | -2.54567 | -3.76491 | -1.82041 |
| 92  | H  | -3.85399 | -3.50954 | -2.98657 |
| 93  | Si | -6.88044 | 1.665772 | 0.930679 |
| 94  | H  | -4.81416 | 0.943552 | 4.720391 |
| 95  | H  | -4.84473 | -0.80142 | 5.030388 |
| 96  | H  | -6.34973 | 0.057218 | 4.661384 |
| 97  | O  | -6.07842 | 1.503024 | -2.77399 |
| 98  | C  | -6.14818 | -0.73325 | -4.5597  |
| 99  | O  | -7.49182 | -0.67085 | -2.03615 |
| 100 | O  | -7.54392 | -2.09853 | 0.240251 |
| 101 | C  | -6.48789 | -4.43667 | 1.501288 |
| 102 | O  | -7.94278 | 0.561475 | 0.320649 |
| 103 | C  | -7.77798 | 2.787807 | 2.111382 |
| 104 | O  | -6.24194 | 2.555293 | -0.28752 |
| 105 | Si | -5.63667 | 2.784385 | -1.81183 |
| 106 | H  | -7.01429 | -0.32761 | -5.09345 |
| 107 | H  | -6.20425 | -1.82623 | -4.60789 |
| 108 | H  | -5.24408 | -0.41288 | -5.08835 |
| 109 | Si | -8.20261 | -0.8106  | -0.55335 |
| 110 | H  | -7.29266 | -4.45779 | 2.243737 |
| 111 | H  | -6.78222 | -5.07656 | 0.662712 |



|     |   |          |          |          |
|-----|---|----------|----------|----------|
| 112 | H | -5.59096 | -4.86621 | 1.95991  |
| 113 | H | -8.21592 | 2.220445 | 2.939961 |
| 114 | H | -7.09529 | 3.533697 | 2.532484 |
| 115 | H | -8.58844 | 3.319879 | 1.601766 |
| 116 | C | -6.40912 | 4.327568 | -2.53012 |
| 117 | C | -3.77728 | 2.864249 | -1.72131 |
| 118 | C | -10.0262 | -1.08557 | -0.76319 |
| 119 | H | -6.19    | 5.210771 | -1.91993 |
| 120 | H | -7.49789 | 4.210749 | -2.57062 |
| 121 | H | -6.05547 | 4.517713 | -3.54943 |
| 122 | H | -3.24761 | 1.974562 | -1.37237 |
| 123 | C | -3.05644 | 3.937439 | -2.07031 |
| 124 | H | -10.5186 | -1.19144 | 0.209198 |
| 125 | H | -10.4868 | -0.24268 | -1.28914 |
| 126 | H | -10.2179 | -1.99463 | -1.34294 |
| 127 | H | -3.52015 | 4.854355 | -2.43143 |
| 128 | H | -1.96895 | 3.957305 | -2.01328 |
| 129 | C | 1.052535 | 1.741569 | 2.565652 |
| 130 | H | 1.144095 | 2.809691 | 2.820888 |
| 131 | H | 0.708401 | 1.260927 | 3.493197 |
| 132 | C | 2.4518   | 1.207996 | 2.170111 |
| 133 | H | 3.187003 | 1.540366 | 2.919723 |
| 134 | H | 2.790455 | 1.657854 | 1.227501 |

---
